## Computational identification of novel Kir6 channel inhibitors

1 Xingyu Chen<sup>1</sup>, Arthur Garon<sup>2</sup>, Marcus Wieder<sup>2</sup>, Marien J.C. Houtman<sup>3</sup>, Eva-Maria Zangerl-  
2 Plessl<sup>1</sup>, Thierry Langer<sup>2</sup>, Marcel A.G. van der Heyden<sup>1,3</sup>, Anna Stary-Weinzinger<sup>1\*</sup>

3 <sup>1</sup>Department of Pharmacology and Toxicology, University of Vienna, Vienna, Austria

4 <sup>2</sup>Department of Pharmaceutical Chemistry, University of Vienna, Vienna, Austria

5 <sup>3</sup>Department of Medical Physiology, Division of Heart and Lungs, University Medical Center  
6 Utrecht, Utrecht, The Netherlands

7 \* **Correspondence:**

8 Corresponding Author

9 [anna.stary@univie.ac.at](mailto:anna.stary@univie.ac.at)

10 **Keywords:** KATP channel, Cantú syndrome, molecular dynamics simulation, dynamic  
11 pharmacophore, channelopathy

### 12 **Abstract**

13 KATP channels consist of four Kir6.x pore-forming subunits and four regulatory sulfonylurea receptor  
14 (SUR) subunits. These channels couple the metabolic state of the cell to membrane excitability and  
15 play a key role in physiological processes such as insulin secretion in the pancreas, protection of cardiac  
16 muscle during ischemia and hypoxic vasodilation of arterial smooth muscle cells. Abnormal channel  
17 function resulting from inherited gain or loss-of-function mutations in either the Kir6.x and/or SUR  
18 subunits are associated with severe diseases such as neonatal diabetes, congenital hyperinsulinism or  
19 Cantú syndrome (CS). CS is an ultra-rare genetic autosomal dominant disorder, caused by dominant  
20 gain-of-function mutations in SUR2A or Kir6.1 subunits. No specific pharmacotherapeutic treatment  
21 options are currently available for Cantú syndrome. Kir6 specific inhibitors could be beneficial for the  
22 development of novel drug therapies for Cantú syndrome, particular for mutations, which lack high  
23 affinity for sulfonylurea inhibitor glibenclamide. By applying a combination of computational methods  
24 including atomistic MD simulations, free energy calculations and pharmacophore modelling, we  
25 identified several novel Kir6.1 inhibitors, which might be possible candidates for drug repurposing.  
26 The *in silico* predictions were confirmed using inside/out patch-clamp analysis. Importantly, Cantú  
27 mutation C176S in Kir6.1 and S1020P in SUR2A, retained high affinity towards the novel inhibitors.  
28 Summarizing, the inhibitors identified in this study might provide a starting point towards developing  
29 novel therapies for Cantú disease.

### 30 **Introduction**

31 Cantú syndrome is a rare genetic autosomal dominant disorder caused by dominant gain-of-function  
32 mutations in the ATP-dependent potassium channel subunits ABCC9 (Harakalova et al., 2012; Van  
33 Bon et al., 2012) and KCNJ8 (Brownstein et al., 2013; Cooper et al., 2014, 2017), encoding SUR2 and  
34 KIR6.1 respectively. Cantú patients are chronically ill; they suffer from congenital hypertrichosis,  
35 distinctive facial features and cardiac defects (Cantú et al., 1982; Nichols et al., 2013; Scurr et al.,  
36 2011) and have a decreased life expectancy. Currently, no specific pharmacotherapeutic options are  
37 available to treat the disease (Kharade et al., 2016).

38 Recent breakthroughs in solving atomic and near-atomic resolution structures of eukaryotic inward  
39 rectifier potassium channels provide an excellent opportunity to investigate the structural basis of CS  
40 mutations and for developing novel therapies for KATP channelopathies. Starting from January 2017,  
41 the first (near-)atomic resolution structures (resolution ranges from 3.63 Å to 6.3 Å) of these hetero-  
42 octameric complexes have been solved by cryo-EM microscopy by three independent labs (Lee et al.,  
43 2017; Li et al., 2017; Martin et al., 2017a, 2017b; Wu et al., 2018). These structures confirm that KATP  
44 channels are formed by four Kir6.x pore-forming subunits and four regulatory sulfonylurea receptor  
45 (SUR) subunits.

46 KATP channels couple the metabolic state of the cell to membrane excitability and play a key role in  
47 physiological processes such as insulin secretion in the pancreas (Ashcroft, 2005), protection of cardiac  
48 muscle during ischemia (Crawford et al., 2002; Nichols and Lederer, 1991; Zingman et al., 2007) and  
49 hypoxic vasodilation of arterial smooth muscle cells (Dart and Standen, 1995).

50 Channel activity is regulated by voltage and ligands. While inhibitory adenosine-triphosphate (ATP)  
51 binds to the Kir6.x subunit, magnesium-adenosine-triphosphate-(MgATP) and adenosine-diphosphate-  
52 (ADP) activate the channel via interacting with the SUR subunits (MacGregor et al., 2002; Matsuo et  
53 al., 1999, 2000; Tanabe et al., 1999; Ueda et al., 1999; Vanoye et al., 2002). Phospholipid  
54 phosphatidylinositol-4,5-bisphosphate (PIP<sub>2</sub>), is necessary for channel opening of all inward rectifying  
55 potassium channels and binds to the Kir6.x subunit (Huang et al., 1998; Shyng and Nichols, 1998;  
56 Zhang et al., 1999). Abnormal channel function, resulting from inherited gain or loss-of-function  
57 mutations in either the Kir6.x and/or SUR subunits are associated with severe diseases such as neonatal  
58 diabetes, congenital hyperinsulinism and Cantú syndrome (Harakalova et al., 2012; Remedi and  
59 Nichols, 2009). Further, SUR2 subunits have been shown to play a role in human neurological disease,  
60 including prevalent diseases of the aged brain (Nelson et al., 2015).

61 Pharmaceutical interventions in KATP channels include sulfonylurea-like inhibitors such as  
62 glibenclamide and channel openers, such as diazoxide, which are clinically used to treat neonatal  
63 diabetes and hypertension and target the sulfonylurea subunits (Gribble and Reimann, 2003; Pearson  
64 et al., 2006). More recently, side effects due to inhibition of KATP channels have been reported as  
65 well. For example, in 2011, Yu et al. (Yu et al., 2011) reported that all isoforms of KATP channels are  
66 blocked by rosiglitazone (RSG) at micro molar concentrations, which could be harmful due to  
67 promotion of adverse cardiovascular effects. RSG is a high-affinity agonist of the peroxisome  
68 proliferator-activated receptor  $\gamma$ , which was introduced in 1999 for the treatment of type II diabetes  
69 mellitus. The drug increases insulin sensitivity in fat cells by regulating genes involved in glucose and  
70 lipid metabolism and might have additional beneficial effects including anti-atherosclerotic, anti-  
71 inflammatory and anticancer effects (Brown and Plutzky, 2007). Due to reports of increased risk of  
72 myocardial infarction, RSG was withdrawn from the market in Europe in 2010 (Agency European  
73 Medicines, 2010) and had its access restricted in the US by the FDA in 2011 (U.S. Food and Drug  
74 Administration, 2011). Recently it was shown that this increased cardiovascular risk might be due to  
75 modification of different ion channels including Kv4.3, L-type calcium channels and KATP channels  
76 (Hancox, 2011; Jeong et al., 2011; Szentandrassy et al., 2011; Yu et al., 2011, 2012). Studies on pigs  
77 demonstrate that RSG and other thiazolidinedione drugs can block cardiac sarcolemmal KATP  
78 channels *in vivo* at clinically relevant doses (Lu et al., 2008). The reported IC<sub>50</sub> of this drug is 45  $\mu$ M  
79 for Kir6.2/SURx (pancreatic and heart) channels and 10  $\mu$ M for vascular Kir6.1/SUR2B. Interestingly,  
80 potency has been shown to be even higher in the presence of therapeutic concentrations of  
81 sulfonylureas reducing the IC<sub>50</sub> to 2  $\mu$ M. Since plasma concentrations of RSG used to treat type II  
82 diabetes mellitus are in the range of 3  $\mu$ M (Cox et al., 2000), block of KATP channels could be a  
83 serious problem. Experiments performed on Kir6.2 $\Delta$ C36 constructs revealed that the drug acts

84 predominantly on the pore-forming Kir6.x subunits and not on the SUR subunits. Further analysis of  
85 single KATP channels suggests that the drug suppresses channel activity by extending long-lasting  
86 channel closures, most likely via modulating the gating mechanism (Yu et al., 2012).

87 Kir6 inhibitors such as RSG, which block channels at clinically relevant doses, could provide a good  
88 starting point towards development of novel, specific inhibitors, suitable for developing drugs towards  
89 treatment of Cantú syndrome. Thus, in this study, we investigated the structural mechanism of pore  
90 block of RSG in Kir6 channels. We carried out extensive unbiased full atomistic simulations of drug  
91 binding to the closed channel state. Based on the thereby identified binding site, we postulate a  
92 structural mechanism by which the drug might prolong the long-closed state of the channel. Further,  
93 structure-based pharmacophore models were constructed to enable identification of novel Kir6  
94 inhibitors, which might be useful for future drug development to treat Cantú disease.

95

## 96 **Results and discussion**

97 Based on the experimental finding that RSG predominantly acts on the long-closed state of Kir6.1  
98 channels (Yu et al., 2012), a homology model of the Kir6.1 pore model was constructed using the  
99 closed state crystal structure of the Kir3.2 channel (Protein Data Bank (PDB) code: 3SYA (Whorton  
100 and MacKinnon, 2011)) as template. A sequence alignment is shown in Supplementary Figure 1A. The  
101 root mean square deviation (RMSD) of the Kir6.1 model converged to  $\sim 4$  Å at around 100 ns,  
102 indicating that the simulated systems are stable and at equilibrium (see Supplementary Figure 1C).  
103 Starting in October 2017, the first atomic resolution structures of the KATP channel formed by Kir6.2  
104 and SUR1 were published (Lee et al., 2017; Li et al., 2017; Martin et al., 2017a, 2017b; Wu et al.,  
105 2018). Thus, we compared the structural differences of our Kir3.2 based homology model with the new  
106 Kir6.2 templates. Due to the low RMSD of the structural alignments ( $< 1.5$  Å, see Supplementary  
107 Figure 1B) we continued to use the Kir6.1 homology model based on the Kir3.2 template in subsequent  
108 molecular dynamics (MD) simulations.

109

## 110 **Unbiased $\mu$ s time scale MD simulations identify putative RSG binding sites**

111 In an effort to identify the putative binding site of RSG (5-[[4-[2-[methyl(pyridin-2-  
112 yl)amino]ethoxy]phenyl]methyl]-1,3-thiazolidine-2,4-dione)), and its main metabolite N-desmethyl  
113 Rosiglitazone (5-[[4-[2-(pyridin-2-ylamino)ethoxy]phenyl]methyl]-1,3-thiazolidine-2,4-dione), N-  
114 RSG for short, full atomistic molecular dynamics simulations were performed. Specifically, the  
115 binding was probed by adding 20 molecules (10 x S conformer, 10 x R conformer, since the prescribed  
116 drug is a racemic mixture) randomly into the solvent, leading to an effective drug concentration of  $\sim$   
117 170 mM. As seen in Figure 1, 13 ligands partition into the lipid membrane within 1,5  $\mu$ s. Three out of  
118 20 molecules occupied sites close to the protein for 1.3 – 1.5  $\mu$ s (see Table 1). The three major binding  
119 sites (Figure 2) identified are: close to the PIP<sub>2</sub> binding site, denoted site A; the interface between two  
120 cytoplasmic domains (CTDs), denoted site B, and between the  $\beta$ -sheet  $\beta$ D and the  $\beta$ G- $\alpha$ G loop,  
121 denoted site C.

122 Binding site A is of particular interest since the ligand binds close to the transmembrane gate and the  
123 PIP<sub>2</sub> binding site. Binding includes mainly hydrophobic interactions with residue LEU57 and ILE60.  
124 Additionally, hydrophobic and hydrogen bond interactions with POPC lipid molecules are observed.

125 Even though PIP<sub>2</sub> is within 5 Å of ligand no specific interactions with RSG are observed. All residues  
126 within 6 Å of ligand are shown in Figure 2C. Given the importance of this area for channel gating  
127 (Zhang et al., 2015), we decided to perform a more exhaustive sampling of this region. We therefore  
128 used computationally less demanding docking simulations with both compounds, followed by 250 ns  
129 MD simulations of the best-scored pose for RSG, and 200 ns of the best-scored pose for N-RSG. This  
130 way, strengthened binding interactions (defined as increased accessible surface area: 0.9 nm<sup>2</sup> for site  
131 A vs. 3 nm<sup>2</sup> when using the best docking pose) were obtained. We refer to this new site A as site A\_ref.

132 To further characterize the three binding sites, the potential of mean force (PMF) of the ligands at site  
133 A\_ref, B and C, were calculated using umbrella sampling (US) simulations. As can be seen in Figure  
134 3, the PMFs reveal clear differences between the three sites. Binding of RSG to site A\_ref is most  
135 favorable. Since PMF calculations reveal shallow binding for ligands bound at sites B and C, we did  
136 not further investigate these two binding sites. Nevertheless, ligand binding site B, might be potentially  
137 interesting, since intersubunit interactions in this region have been shown previously to be important  
138 for the inactivation process in Kir6.2 channels (Borschel et al., 2017; Lin et al., 2003).

139

#### 140 **Detailed characterization of binding site A\_ref**

141 The interactions of RSG and N-RSG at site A\_ref over 200 ns of the MD simulations were quantified  
142 using interaction matrices as described in the methods section. Ligands were decomposed as five parts  
143 (Figure 4A and Supplementary Figure 2): the pyridine (Ring A), the benzene (Ring B), the  
144 thiazolidinedione (Ring C), the linker connecting pyridine and benzene (Linker D), and the linker  
145 connecting benzene and thiazolidinedione (Linker E). RSG mainly formed hydrophobic interactions  
146 with the binding site throughout the trajectory. More than 75% of the frames contain hydrophobic  
147 interactions between the Ring A and residue PHE76, VAL172 and MET173, and between the Linker  
148 E and TRP69. Residues LEU64, ILE75, PHE80, ILE168 and ILE169 also frequently formed  
149 hydrophobic interactions with RSG (Figure 4B). The interaction map of N-RSG molecule reveals a  
150 similar trend indicating mainly hydrophobic interactions with the binding site (see Supplementary  
151 Figure 2). Both ligands also form hydrogen bonds with POPC lipid molecules, which are not included  
152 in the interaction map calculations.

153

#### 154 **Structure based dynamic pharmacophore models of RSG binding to site A\_ref**

155 Understanding the inhibition mechanisms of the pore-forming Kir6.1 subunit could be a first step to  
156 develop novel blockers for the treatment of rare disease causing mutations (e.g. Cantú mutations  
157 V64M), which are not amenable for sulfonyleurea therapy (Cooper et al., 2017). In line with this  
158 reasoning we constructed dynamic structure-based pharmacophore models and screened for hits in  
159 *DrugBank* (Law et al., 2014), which contains all marketed drugs, by using the common hits approach  
160 (CHA) (Wieder et al., 2017). Structure-based pharmacophore models were generated using 5,000  
161 frames from the MD simulation, which included the lipid bilayer but omitted solvent molecules.  
162 Pharmacophore models, which contain common pharmacophore features and identical involved ligand  
163 atoms, are considered as one representative pharmacophore model. Five representative pharmacophore  
164 models (Model 1 - 5) were observed from the frames (shown in Supplementary Figure 3). Model 1 was  
165 observed most frequently (> 95%, 4,776 times out of 5,000 of frames). The other four models appeared  
166 in less than 5% of the frames. All models share two hydrophobic features formed with pyridine and  
167 benzene in the ligand. Model 1 contains one additional hydrogen bond donor with the NH moiety of

168 thiazolidinedione. Model 2 only contains the shared hydrophobic features. Model 3 and Model 4 also  
169 share the same hydrophobic features plus one hydrogen bond donor and one hydrogen bond acceptor.  
170 Model 5 comprises the shared hydrophobic features and one hydrogen bond acceptor. All five  
171 pharmacophore models were used to screen *DrugBank*. The top ranked hitlist for binding site A\_ref is  
172 shown in Table 2.

173

### 174 **Inhibition of Kir6.2/SUR2A by Travoprost, Betaxolol and Ritodrine**

175 From earlier work it was established that in the absence of pharmacological activation, Kir6.1/Sur2a  
176 channels yield very low current amplitude which hampers efficacy assessment of blockers (Cooper et  
177 al., 2014). Therefore, Travoprost, Betaxolol and Ritodrine (three top ranked hits (Table 2)) were tested  
178 for Kir6.2/SUR2A inhibition instead, using the inside/out mode on HEK293T cell derived excised  
179 membrane patches. Travoprost ( $IC_{50outward}=2.46\pm 0.52 \mu M$ ; Hill coefficient 0.71;  
180  $IC_{50inward}=2.30\pm 1.26 \mu M$ ; Hill coefficient 0.65) dose-dependently inhibited inward and outward  
181 current components of  $I_{Kir6.2/SUR2A}$  whereas Betaxolol ( $IC_{50outward}=22.06\pm 2.47 \mu M$ ; Hill coefficient  
182 0.89) and Ritodrine ( $IC_{50outward}=7.09\pm 0.45 \mu M$ ; Hill coefficient 0.86) markedly and dose-  
183 dependently inhibited the outward component (Figure 5). Betaxolol and Ritodrine induced rectification  
184 behavior of the channel, i.e. outward current was more strongly inhibited than inward current (Figure  
185 5B). This induction of rectification is in contrast with inhibition characteristics of Travoprost and RSG.  
186 Similar findings have been made with Pentamidine and Pentamidine-Analogue-6 (De Boer et al., 2010;  
187 Takanari et al., 2013). These structurally related compounds bind to the same site in the Kir2.1 channel,  
188 but whereas Pentamidine induces channel rectification (De Boer et al., 2010), Pentamidine-Analogue-  
189 6 inhibited both inward and outward current with similar efficacy (Takanari et al., 2013).

190

### 191 **Further experimental support of RSG binding to site A\_ref**

192 Experimental data from Yu et al., 2012 (Yu et al., 2012) revealed that RSG binding to inward rectifier  
193  $K^+$  channels is Kir6.x specific. Electrophysiology measurements on Kir1.1, Kir2.1 and Kir4.1 channels  
194 showed that these channels are insensitive to RSG. Thus, we performed a multiple sequence alignment  
195 of these channels and evaluated the conservation of the predicted binding site residues. As shown in  
196 Figure 6, differences between Kir6.x and members of other Kir channels at site A\_ref can be found at  
197 positions 64 (LEU vs. VAL/CYS/PHE), 79 (SER vs. ALA/THR), 172 (VAL/ILE vs. PHE) and 176  
198 (CYS vs. ALA/THR). Of particular interest is position 172, which contains a bulky phenylalanine side  
199 chain in non-Kir6.x channels, which would prevent RSG from binding in a similar mode in these  
200 channels. Experimental mapping of the binding site has not been performed, possibly due to challenges  
201 measuring Kir6.1 subunits (Cooper et al., 2014). Nevertheless, mutational data on the closely related  
202 Kir6.2 channel supports that residues in the binding area are critical for normal channel gating (Zhang  
203 et al., 2015). Interestingly, two Cantú disease causing gain-of-function mutations (V65M, C176S)  
204 (Brownstein et al., 2013; Cooper et al., 2014) are in close proximity to binding site A\_ref, further  
205 supporting the importance of this region for gating. A further, indirect validation of the binding site  
206 was gained by correctly identifying novel hits in *DrugBank*, based on the *in silico* predicted structure-  
207 based drug-protein interactions.

208

## 209 **Suggestions for experimental validation of the binding site**

210 Our modelling predictions suggest that mutating position VAL172 to PHE should decrease or prevent  
211 binding of RSG and its main metabolite N-RSG. Unfortunately, mutating the equivalent position in  
212 Kir6.2 (ILE162) to PHE does not produce functional channels (Piao et al., 2001), preventing  
213 experimental validation of this prediction. Since the binding site is very close to the PIP<sub>2</sub> molecule,  
214 interference of PIP<sub>2</sub> interactions with the channel are likely. Previous studies on other Kir channels,  
215 support drug PIP<sub>2</sub> interference for drugs such as carvedilol and ivermectin (Chen et al., 2017; Ferrer et  
216 al., 2011; Kikuta et al., 2006) or the anti-cancer agent gamboic acid (Scherer et al., 2017). For a recent  
217 review see (Heyden et al., 2013).

218

## 219 **Proposed mechanism of drug action**

220 RSG binds at the interface between two subunits, very close to PIP<sub>2</sub>, an essential gating modulator of  
221 inward rectifier channels. It is conceivable that the drug interferes with normal channel activation,  
222 possibly via “blocking” the activation gate and/or via hindering normal lipid modulation of channels.  
223 In line with this reasoning, we observed frequent hydrogen bonds to lipid molecules in our simulations.  
224 Further simulations, using different lipid types will be necessary in the future to investigate this  
225 possibility. In addition, the predicted binding site A\_ref is in close proximity of two previously  
226 identified gain-of-function mutations causing Cantú disease (V65M and C176S (Brownstein et al.,  
227 2013; Cooper et al., 2014)). So far 100 ns MD simulations on these two mutations have been performed  
228 (Cooper et al., 2017), revealing no changes in this region. Thus, in order to investigate if RSG or the  
229 newly identified inhibitors might be able to counterbalance the gating disturbance effects of Cantú  
230 mutations, we determined dose-response effects of currents mediated by C166S Kir6.2, which is  
231 homologues to C176S in Kir6.1.

232

## 233 **Cantú mutations C166S (Kir6.2) and S1020P (SUR2A) are inhibited by RSG, Ritodrine,** 234 **Travoprost and Betaxolol**

235 Since CS C176S mutant is in close proximity of the predicted binding site A\_ref, we performed  
236 inside/out measurements on Kir6.2 C166S, the homologues mutation of Kir6.1 C176S, with RSG and  
237 the newly identified drugs Travoprost, Betaxolol and Ritodrine. As shown in Figure 7 all drugs dose-  
238 dependent inhibit outward current, having IC<sub>50</sub> similar as WT channels (RSG: WT 25.98±1.49 μM vs.  
239 C166S 34.88±2.34 μM n.s.; Ritodrine: WT 7.09±0.45 μM vs. C166S 10.42±0.87 n.s.; Betaxolol: WT  
240 22.06±2.47 vs. 41.16±2.89 μM n.s.) except for Travoprost (WT 2.46±0.52 μM vs. 14.82±2.16 μM,  
241 p<0.05).

242 Since the majority of Cantú mutations have been identified in the SUR2A subunits, we also tested the  
243 inhibitors on currents mediated by the S1020P SUR2A mutation. Again, mutant channels were  
244 sensitive for all for compounds with outward current IC<sub>50</sub> values (Rosiglitazone: 25.38±4.24 μM;  
245 Ritodrine: 6.77±0.49 μM ; Betaxolol: 29.51±3.78 μM) not significantly different from WT channels  
246 except for Travoprost (10.99±1.28, p<0.05 vs. WT).

247

## 248 **Conclusions**

249 Understanding the molecular mechanisms of inhibition of Kir6.x channels is critical to in paving the  
250 way to develop novel blockers, useful for the treatment of channelopathies such as neonatal diabetes  
251 (Remedi et al., 2017) or Cantú syndrome (Brownstein et al., 2013; Cooper et al., 2014). Further, our  
252 study provides insights into how RSG might exert its cardiovascular side effects, via interfering with  
253 its gating mechanism. We performed unbiased MD simulations on the microsecond time scale of the  
254 pore forming Kir6.1 model with RSG randomly placed in the solvent. After identification of a putative  
255 RSG binding site, we constructed dynamic pharmacophore models using the recently introduced  
256 common hits approach and screened for hits in *DrugBank*, which contains all drugs available on the  
257 market. Functional testing confirmed three new high affinity blockers, with different chemical  
258 scaffolds (see Figure 5). The identified compounds (see Table 2) provide an important first starting  
259 point for developing novel therapies for rare diseases such as CS. Taken together this study provides  
260 novel insights into the structural basis of Kir6.x channel block and may have broader implications for  
261 the molecular pharmacology of Kir6 channels in general.

262

## 263 **Methods**

### 264 **Homology modelling**

265 At the beginning of this study, no atomic resolution structure of a KATP channel was available. Thus,  
266 a Kir6.1 homology model in the closed state was built using the crystal structure of Kir3.2 (PDB code:  
267 3SYA (Whorton and MacKinnon, 2011), 2.98 Å resolution) as template with the program  
268 Modeller9.11 (Martí-Renom et al., 2000). The sequence identity between Kir6.1 and Kir3.2 is 48.36%.  
269 The sequence alignments can be found in Supplementary Figure 1A. Comparison of the Kir3.2  
270 template with recent available Kir6.2 structures reveal that the structures are highly similar with RMSD  
271 values below 1 Å (comparing the transmembrane domains). The structural alignments, generated with  
272 the Swiss-pdb-viewer (Guex and Peitsch, 1997) are shown in Supplementary Figure 1B.

273

### 274 **MD simulations**

275 MD simulations were performed using Gromacs5.1 (Abraham et al., 2015) and the Amber99sb force  
276 field (Hornak et al., 2006). The Kir6.1 protein was embedded into the  
277 palmitoylcholine (POPC) lipid bilayer with four PIP<sub>2</sub> molecules bound to the  
278 channel, as described previously (Lee et al., 2016). PIP<sub>2</sub> was parameterized using the Hartree-Fock  
279 geometry optimization with the 6-31G\* basis set (Frisch et al., 2013). POPC parameters were taken  
280 from Berger lipids parameters (Berger et al., 1997). The system was solvated using the SPCE water  
281 model (Berendsen et al., 1987; Kusalik and Svishchev, 1994) and 150 mM KCl were added to the  
282 solvent. To keep the selectivity filter stable, five K<sup>+</sup> ions were placed at sites S0 to S4. The force field  
283 parameters of the ligand were generated and optimized with Gaussian09 (HF/6-31G\* basis set) and  
284 antechamber (Wang et al., 2004, 2006). Ten R-form and ten S-form ligands were randomly placed in  
285 the solvent of the system. The algorithm to integrate Newton's equation of motion was leap-frog, with  
286 a time step of 2 fs. The LINCS algorithm (Hess et al., 1997) was used to constrain all bonds. The  
287 cutoff-scheme for neighbor searching used Verlet (Verlet, 1967) within 1 nm and updated the list every  
288 10 fs. The electrostatics and VdW interactions were measured with the particle-mesh Ewald (PME)  
289 method (Darden et al., 1993), using a cut-off of 1 nm and Fourier spacing of 0.16 nm. Temperature  
290 coupling used the V-rescale method (Bussi et al., 2007) at a reference temperature of 310 K and time  
291 constant 0.1 ps. The pressure was kept constant at 1 bar by using the Parrinello-Rahman barostat

292 algorithm (Parrinello and Rahman, 1981) with a coupling constant of 2 ps. The system was minimized  
293 with the steepest descent algorithm, followed by a 6 ns equilibration simulation. 1.5  $\mu$ s unbiased MD  
294 simulations were performed to detect the ligand binding sites. Additionally, 200 ns MD simulations  
295 were run from the best docking pose of the ligand.

296

## 297 **Docking**

298 RSG was docked at the putative binding site identified from unbiased MD simulations, using the  
299 program Gold4.0.1 (Jones et al., 1997). The binding sites identified in the 1.5  $\mu$ s free MD simulations  
300 were used as starting point and the radius was set to 20 Å. 100,000 operations of the GOLD genetic  
301 algorithm were used to dock the compounds with the ChemPLP scoring function.

302

## 303 **Umbrella sampling (US)**

304 In order to estimate the ligand binding affinity, we performed US at each binding site. Ligands were  
305 firstly pulled into the solvent using the pull code in GROMACS by applying a harmonic biasing force  
306 between the center of mass (COM) of ligand and the COM of binding site (defined by residues within  
307 5 Å of the ligand). The initial systems were taken from the last frames of the MD simulations for  
308 binding sites A\_ref, B and C. To ensure that the ligands were pulled along the reaction coordinates  
309 fully into the solvent area, a harmonic force of 1,000 kJ/(mol·nm<sup>2</sup>) was applied for most of the pulling  
310 simulations. In cases, where the ligand displayed high mobility during the pulling trajectories, the  
311 harmonic force was increased to 2,000 kJ/(mol·nm<sup>2</sup>). Starting configurations for US were chosen from  
312 the pulling trajectories by taking steps every 0.1 nm along the reaction coordinates. Several  
313 intermediate windows were added if the adjacent US windows did not overlap sufficiently. Harmonic  
314 forces of 500, 1,000, 2,000 or 3,000 kJ/(mol·nm<sup>2</sup>) were applied to restrict the ligands during US  
315 sampling. For each window, a 10 ns simulation was performed, excluding the first 1 ns as equilibration.  
316 In total, 242 windows were simulated. Thus, in total, 2.42  $\mu$ s simulations were performed to obtain  
317 good US window overlaps (Supplementary Figure 4). The potential of mean forces (PMF) were  
318 calculated by using weighted histogram analysis method (WHAM) (Hub et al., 2010) and the statistical  
319 errors were estimated by 100 times bootstrap analysis (Efron, 1979). A more detailed description about  
320 the US method can be found in the Supplementary Methods.

321

## 322 **Pharmacophore modelling**

323 The recent published Common Hits Approach (CHA) (Wieder et al., 2017) was applied to construct  
324 dynamic pharmacophore models and to generate a hit-list by virtual screening in *DrugBank* (Law et  
325 al., 2014). The CHA is implemented by *LigandScout 4.10* (Wolber and Langer, 2005).

326 5,000 snapshots were extracted from the last 100 ns MD simulation of RSG at binding site A\_ref and  
327 used as input for the CHA. For each snapshot, a pharmacophore model was built by considering the  
328 ligand interactions with protein and lipids. Water molecules were discarded during the pharmacophore  
329 generation. Pharmacophore features (mainly including hydrophobic interactions, hydrogen bond  
330 donor/acceptor, aromatic ring, ionizable area etc.) and constrains were defined as described in detail in  
331 the *LigandScout* user manual (*LigandScout* user manual, 2010).



332 Representative pharmacophore models were obtained by merging all identical features, extracted from  
333 the 5,000 frames. In the end, five representative pharmacophore models were used for virtual screening  
334 against *DrugBank4.0* (Law et al., 2014) (see Supplementary Figure 3). The molecules in *DrugBank*  
335 were prepared as libraries for virtual screening using the *LigandScout* command line tool *idbgen*.  
336 Conformers for each molecule in the database were generated using the icon best option in *idbgen*; this  
337 option produces a maximum number of 200 conformations for each molecule processed. The CHA  
338 produced a ranked hit-list for the binding site. The approved drugs that fits at least two of the five  
339 representative pharmacophore models were proposed in the final hit-list shown in Table 2.

340

### 341 Interaction map

342 The interactions of RSG and N-RSG at site A\_ref (only protein and PIP<sub>2</sub> were considered) over the  
343 200 ns MD simulations were analyzed and quantified by interaction maps, which were generated by  
344 the python package *matplotlib* (Hunter, 2007) and the chemoinformatic toolkit *CDPkit* (Seidel and  
345 Langer, 2017). Interactions were analyzed by generating a structure-based pharmacophore model at  
346 every saved frame of the MD trajectories and subsequently analyzing the frequency of the individual  
347 features. The interaction types were defined and described as pharmacophore features in the  
348 *LigandScout* user manual, including hydrophobic (H), hydrogen bond (HB) acceptor/donor, positive  
349 ionizable (PI) and aromatic (AR) features. The ligands were decomposed into five areas (Figure 4A  
350 and Supplementary Figure 2): the pyridine (Ring A), the benzene (Ring B), the thiazolidinedione (Ring  
351 C), the linker connecting pyridine and benzene (Linker D), and the linker connecting benzene and  
352 thiazolidinedione (Linker E). The frequencies of interactions observed were numbered and colored in  
353 the interaction map.

354

### 355 Electrophysiology

356 Inside-out patch clamp electrophysiology was performed as described previously (Harakalova et al.,  
357 2012). In short, HEK293T cells were cultured on 10 mm glass coverslips and transfected with 0.16 µg  
358 of rat pCMV6-Kir6.2, 0.16 µg of rat pCMV6-SUR2A and 0.08 µg of pEGFP1 expression constructs.  
359 Measurements were performed using an AxoPatch 200B amplifier controlled by pClamp 9 software  
360 (Molecular Devices) at 22 °C using a ramp protocol ranging from -100 to +100 mV in 5 s from a  
361 holding potential of -40 mV. The sampling rate was 50 kHz, filter frequency was 2 kHz. Bath solution  
362 contained 131 mM KCl, 1 mM EGTA, 7.2 mM K<sub>2</sub>HPO<sub>4</sub>, 2.8 mM KH<sub>2</sub>PO<sub>4</sub>, 1 mM MgCl<sub>2</sub>, pH  
363 7.20/KOH. The pipette solution contained 145 mM KCl, 1 mM CaCl<sub>2</sub>, 1 mM MgCl<sub>2</sub>, 5 mM HEPES,  
364 pH 7.40/KOH. Pipette resistance was 1.5-3 MΩ. Data were not corrected for rundown, which was less  
365 than 10% at 10 minutes. All measurements were performed within a timeframe of 8-10 minutes.  
366 Fractional block at -80 and +50 mV was determined by dividing current levels obtained with test  
367 compound containing solutions by current levels of control traces recorded in the absence of test  
368 compound.

369 Betaxolol (Sigma-Aldrich, St. Louis MO, USA) and Ritodrine (Sigma-Aldrich) were dissolved in H<sub>2</sub>O  
370 at 100 mM. Travoprost (MedChemExpress, Monmouth Junction, NJ, USA) was dissolved in DMSO  
371 at 10 mM. Test compounds were diluted in bath solution at the indicated concentrations before the start  
372 of measurements.

373

## 374 **Author contributions**

375 XC, MW, AG and MJCH performed research, ASW and MvdH designed the study, XC, MW, EMZP,  
376 AG, MJCH, TL, MvdH and ASW analyzed data, ASW, MW, MvdH and XC wrote the paper. All  
377 authors reviewed the manuscript.

378

## 379 **Competing interests**

380 The authors declare no competing interests.

381

## 382 **Funding**

383 This work was supported by the Austrian Science Fund (FWF; <http://www.fwf.ac.at>). ASW and XC  
384 are supported by FWF grant I2101 (E-RARE 2). ASW, XC and EMZP are supported the doctoral  
385 program “Molecular drug targets” W1232 (FWF). MvdH and MJCH are supported by the E-Rare 2  
386 Joint Transnational CantuTreat program.

387

## 388 **Acknowledgements**

389 The computational results presented have been achieved in part using the Vienna Scientific Cluster  
390 (VSC).

391

## 392 **References**

393 Abraham, M. J., Murtola, T., Schulz, R., Páll, S., Smith, J. C., Hess, B., et al. (2015). Gromacs: High  
394 performance molecular simulations through multi-level parallelism from laptops to  
395 supercomputers. *SoftwareX* 1–2, 19–25. doi:10.1016/j.softx.2015.06.001.

396 Agency European Medicines (2010). European Medicines Agency: EMA/585784/2010 - European  
397 Medicines Agency recommends suspension of Avandia, Avandamet and Avaglim. Available at:  
398 [http://www.ema.europa.eu/docs/en\\_GB/document\\_library/Press\\_release/2010/09/WC50009699](http://www.ema.europa.eu/docs/en_GB/document_library/Press_release/2010/09/WC500096996.pdf)  
399 [6.pdf](http://www.ema.europa.eu/docs/en_GB/document_library/Press_release/2010/09/WC500096996.pdf) [Accessed May 16, 2018].

400 Ashcroft, F. M. (2005). ATP-sensitive potassium channelopathies: Focus on insulin secretion. *J.*  
401 *Clin. Invest.* 115, 2047–2058. doi:10.1172/JCI25495.

402 Berendsen, H. J. C., Grigera, J. R., and Straatsma, T. P. (1987). The missing term in effective pair  
403 potentials. *J. Phys. Chem.* 91, 6269–6271. doi:10.1021/j100308a038.

404 Berger, O., Edholm, O., and Jähnig, F. (1997). Molecular dynamics simulations of a fluid bilayer of  
405 dipalmitoylphosphatidylcholine at full hydration, constant pressure, and constant temperature.

- 406 *Biophys. J.* 72, 2002–2013. doi:10.1016/S0006-3495(97)78845-3.
- 407 Borschel, W. F., Wang, S., Lee, S., and Nichols, C. G. (2017). Control of Kir channel gating by  
408 cytoplasmic domain interface interactions. *J. Gen. Physiol.* 149, 561–576.  
409 doi:10.1085/jgp.201611719.
- 410 Brown, J. D., and Plutzky, J. (2007). Peroxisome proliferator-activated receptors as transcriptional  
411 nodal points and therapeutic targets. *Circulation* 115, 518–533.  
412 doi:10.1161/CIRCULATIONAHA.104.475673.
- 413 Brownstein, C. A., Towne, M. C., Luquette, L. J., Harris, D. J., Marinakis, N. S., Meinecke, P., et al.  
414 (2013). Mutation of KCNJ8 in a patient with Cantú syndrome with unique vascular  
415 abnormalities - support for the role of K(ATP) channels in this condition. *Eur. J. Med. Genet.*  
416 56, 678–682. doi:10.1016/j.ejmg.2013.09.009.
- 417 Bussi, G., Donadio, D., and Parrinello, M. (2007). Canonical sampling through velocity rescaling. *J.*  
418 *Chem. Phys.* 126, 014101. doi:10.1063/1.2408420.
- 419 Cantú, J. M., Garcia-Cruz, D., Sánchez-Corona, J., Hernández, A., and Nazará, Z. (1982). A distinct  
420 osteochondrodysplasia with hypertrichosis-Individualization of a probable autosomal recessive  
421 entity. *Hum. Genet.* 60, 36–41. doi:10.1007/BF00281261.
- 422 Chen, I. S., Tateyama, M., Fukata, Y., Uesugi, M., and Kubo, Y. (2017). Ivermectin activates GIRK  
423 channels in a PIP2-dependent, G $\beta$  $\gamma$ -independent manner and an amino acid residue at the slide  
424 helix governs the activation. *J. Physiol.* 595, 5895–5912. doi:10.1113/JP274871.
- 425 Cooper, P. E., McClenaghan, C., Chen, X., Stary-Weinzinger, A., and Nichols, C. G. (2017).  
426 Conserved functional consequences of disease-associated mutations in the slide helix of Kir6.1  
427 and Kir6.2 subunits of the ATP-sensitive potassium channel. *J. Biol. Chem.* 292, 17387–17398.  
428 doi:10.1074/jbc.M117.804971.
- 429 Cooper, P. E., Reutter, H., Woelfle, J., Engels, H., Grange, D. K., van Haften, G., et al. (2014).  
430 Cantú syndrome resulting from activating mutation in the KCNJ8 gene. *Hum. Mutat.* 35, 809–  
431 813. doi:10.1002/humu.22555.
- 432 Cox, P. J., Ryan, D. A., Hollis, F. J., Harris, A. M., Miller, A. K., Vousden, M., et al. (2000).  
433 Absorption, disposition, and metabolism of rosiglitazone, a potent thiazolidinedione insulin  
434 sensitizer, in humans. *Drug Metab. Dispos.* 28, 772–780. Available at:  
435 <http://www.ncbi.nlm.nih.gov/pubmed/10859151> [Accessed February 21, 2018].
- 436 Crawford, R. M., Budas, G. R., Jovanović, S., Ranki, H. J., Wilson, T. J., Davies, A. M., et al.  
437 (2002). M-LDH serves as a sarcolemmal KATP channel subunit essential for cell protection  
438 against ischemia. *EMBO J.* 21, 3936–3948. doi:10.1093/emboj/cdf388.
- 439 Darden, T., York, D., and Pedersen, L. (1993). Particle mesh Ewald: An N·log(N) method for Ewald  
440 sums in large systems. *J. Chem. Phys.* 98, 10089–10092. doi:10.1063/1.464397.
- 441 Dart, C., and Standen, N. B. (1995). Activation of ATP-dependent K<sup>+</sup> channels by hypoxia in  
442 smooth muscle cells isolated from the pig coronary artery. *J. Physiol.* 483, 29–39.  
443 doi:10.1113/jphysiol.1995.sp020565.

- 444 De Boer, T., Nalos, L., Sary, A., Kok, B., Houtman, M., Antoons, G., et al. (2010). The anti-  
445 protozoal drug pentamidine blocks KIR2.x-mediated inward rectifier current by entering the  
446 cytoplasmic pore region of the channel. *Br. J. Pharmacol.* 159, 1532–1541. doi:10.1111/j.1476-  
447 5381.2010.00658.x.
- 448 Efron, B. (1979). Bootstrap methods: Another look at the Jackknife. *Ann. Stat.* 7, 1–26.  
449 doi:10.1214/aos/1176344552.
- 450 Ferrer, T., Ponce-Balbuena, D., López-Izquierdo, A., Aréchiga-Figueroa, I. A., De Boer, T. P., Van  
451 Der Heyden, M. A. G., et al. (2011). Carvedilol inhibits Kir2.3 channels by interference with  
452 PIP2-channel interaction. *Eur. J. Pharmacol.* 668, 72–77. doi:10.1016/j.ejphar.2011.05.067.
- 453 Frisch, M. J., Trucks, G. W., Schlegel, H. B., Scuseria, G. E., Robb, M. A., Cheeseman, J. R., et al.  
454 (2013). Gaussian 09, Revision D.01, Gaussian, Inc., Wallingford CT.
- 455 Gribble, F. M., and Reimann, F. (2003). Sulphonylurea action revisited: The post-cloning era.  
456 *Diabetologia* 46, 875–891. doi:10.1007/s00125-003-1143-3.
- 457 Guex, N., and Peitsch, M. C. (1997). SWISS-MODEL and the Swiss-Pdb Viewer: An environment  
458 for comparative protein modeling. *Electrophoresis* 18, 2714–2723.  
459 doi:10.1002/elps.1150181505.
- 460 Hancox, J. C. (2011). Cardiac ion channel modulation by the hypoglycaemic agent rosiglitazone. *Br.*  
461 *J. Pharmacol.* 163, 496–498. doi:10.1111/j.1476-5381.2011.01281.x.
- 462 Harakalova, M., Van Harssel, J. J. T., Terhal, P. A., Van Lieshout, S., Duran, K., Renkens, I., et al.  
463 (2012). Dominant missense mutations in ABCC9 cause Cantú syndrome. *Nat. Genet.* 44, 793–  
464 796. doi:10.1038/ng.2324.
- 465 Hess, B., Bekker, H., Berendsen, H. J. C., and Fraaije, J. G. E. M. (1997). LINC: A Linear  
466 Constraint Solver for molecular simulations. *J. Comput. Chem.* 18, 1463–1472.  
467 doi:10.1002/(SICI)1096-987X(199709)18:12<1463::AID-JCC4>3.0.CO;2-H.
- 468 Heyden, M., Sary-Weinzinger, A., and Sanchez-Chapula, J. (2013). Inhibition of cardiac inward  
469 rectifier currents by cationic amphiphilic drugs. *Curr. Mol. Med.* 13, 1284–1298.  
470 doi:10.2174/15665240113139990043.
- 471 Hornak, V., Abel, R., Okur, A., Strockbine, B., Roitberg, A., and Simmerling, C. (2006). Comparison  
472 of multiple amber force fields and development of improved protein backbone parameters.  
473 *Proteins* 65, 712–725. doi:10.1002/prot.21123.
- 474 Huang, C. L., Feng, S. Y., and Hilgemann, D. W. (1998). Direct activation of inward rectifier  
475 potassium channels by PIP2 and its stabilization by G beta gamma. *Nature* 391, 803–806.  
476 doi:10.1038/35882.
- 477 Hub, J. S., De Groot, B. L., and Van Der Spoel, D. (2010). g\_whams—a free Weighted Histogram  
478 Analysis implementation including robust error and autocorrelation estimates. *J. Chem. Theory*  
479 *Comput.* 6, 3713–3720. doi:10.1021/ct100494z.
- 480 Hunter, J. D. (2007). Matplotlib: A 2D graphics environment. *Comput. Sci. Eng.* 9, 99–104.

- 481 doi:10.1109/MCSE.2007.55.
- 482 Jeong, I., Choi, B., and Hahn, S. (2011). Rosiglitazone inhibits Kv4.3 potassium channels by open-  
483 channel block and acceleration of closed-state inactivation. *Br. J. Pharmacol.* 163, 510–520.  
484 doi:10.1111/j.1476-5381.2011.01210.x.
- 485 Jones, G., Willett, P., Glen, R. C., Leach, A. R., and Taylor, R. (1997). Development and validation  
486 of a genetic algorithm for flexible docking. *J. Mol. Biol.* 267, 727–748.  
487 doi:10.1006/jmbi.1996.0897.
- 488 Kharade, S. V, Nichols, C., and Denton, J. S. (2016). The shifting landscape of KATP  
489 channelopathies and the need for “sharper” therapeutics. *Future Med. Chem.* 8, 789–802.  
490 doi:10.4155/fmc-2016-0005.
- 491 Kikuta, J. I., Ishii, M., Kishimoto, K., and Kurachi, Y. (2006). Carvedilol blocks cardiac KATP and  
492 KG but not IK1 channels by acting at the bundle-crossing regions. *Eur. J. Pharmacol.* 529, 47–  
493 54. doi:10.1016/j.ejphar.2005.10.059.
- 494 Kusalik, P. G., and Svishchev, I. M. (1994). The spatial structure in liquid water. *Science (80- )*. 265,  
495 1219–1221. doi:10.1126/science.265.5176.1219.
- 496 Law, V., Knox, C., Djoumbou, Y., Jewison, T., Guo, A. C., Liu, Y., et al. (2014). DrugBank 4.0:  
497 Shedding new light on drug metabolism. *Nucleic Acids Res.* 42, D1091–D1097.  
498 doi:10.1093/nar/gkt1068.
- 499 Lee, K. P. K., Chen, J., and MacKinnon, R. (2017). Molecular structure of human KATP in complex  
500 with ATP and ADP. *Elife* 6, e32481. doi:10.7554/eLife.32481.
- 501 Lee, S.-J., Ren, F., Zangerl-Plessl, E.-M., Heyman, S., Stary-Weinzinger, A., Yuan, P., et al. (2016).  
502 Structural basis of control of inward rectifier Kir2 channel gating by bulk anionic phospholipids.  
503 *J. Gen. Physiol.* 148, 227–237. doi:10.1085/jgp.201611616.
- 504 Li, N., Wu, J. X., Ding, D., Cheng, J., Gao, N., and Chen, L. (2017). Structure of a pancreatic ATP-  
505 sensitive potassium channel. *Cell* 168, 101–110.e10. doi:10.1016/j.cell.2016.12.028.
- 506 LigandScout user manual (2010). Available at:  
507 <http://www.inteligand.com/ligandscout3/downloads/ligandscout-manual-2010-04-15.pdf>  
508 [Accessed May 16, 2018].
- 509 Lin, Y.-W., Jia, T., Weinsoft, A. M., and Shyng, S.-L. (2003). Stabilization of the activity of ATP-  
510 sensitive potassium channels by ion pairs formed between adjacent Kir6.2 subunits. *J. Gen.*  
511 *Physiol.* 122, 225–37. doi:10.1085/jgp.200308822.
- 512 Lu, L., Reiter, M. J., Xu, Y., Chicco, A., Greyson, C. R., and Schwartz, G. G. (2008).  
513 Thiazolidinedione drugs block cardiac KATP channels and may increase propensity for  
514 ischaemic ventricular fibrillation in pigs. *Diabetologia* 51, 675–685. doi:10.1007/s00125-008-  
515 0924-0.
- 516 MacGregor, G. G., Dong, K., Vanoye, C. G., Tang, L., Giebisch, G., and Hebert, S. C. (2002).  
517 Nucleotides and phospholipids compete for binding to the C terminus of KATP channels. *Proc.*

- 518 *Natl. Acad. Sci. U. S. A.* 99, 2726–2731. doi:10.1073/pnas.042688899.
- 519 Martí-Renom, M. A., Stuart, A. C., Fiser, A., Sánchez, R., Melo, F., and Šali, A. (2000).  
520 Comparative protein structure modeling of genes and genomes. *Annu. Rev. Biophys. Biomol.*  
521 *Struct.* 29, 291–325. doi:10.1146/annurev.biophys.29.1.291.
- 522 Martin, G. M., Kandasamy, B., DiMaio, F., Yoshioka, C., and Shyng, S.-L. (2017a). Anti-diabetic  
523 drug binding site in a mammalian KATP channel revealed by Cryo-EM. *Elife* 6, e31054.  
524 doi:10.7554/eLife.31054.
- 525 Martin, G. M., Yoshioka, C., Rex, E. A., Fay, J. F., Xie, Q., Whorton, M. R., et al. (2017b). Cryo-EM  
526 structure of the ATP-sensitive potassium channel illuminates mechanisms of assembly and  
527 gating. *Elife* 6, e24149. doi:10.7554/eLife.24149.
- 528 Matsuo, M., Kioka, N., Amachi, T., and Ueda, K. (1999). ATP binding properties of the nucleotide-  
529 binding folds of SUR1. *J. Biol. Chem.* 274, 37479–37482. doi:10.1074/jbc.274.52.37479.
- 530 Matsuo, M., Tanabe, K., Kioka, N., Amachi, T., and Ueda, K. (2000). Different binding properties  
531 and affinities for ATP and ADP among sulfonylurea receptor subtypes, SUR1, SUR2A, and  
532 SUR2B. *J. Biol. Chem.* 275, 28757–28763. doi:10.1074/jbc.M004818200.
- 533 Nelson, P. T., Wang, W. X., Wilfred, B. R., Wei, A., Dimayuga, J., Huang, Q., et al. (2015). Novel  
534 human ABCC9/SUR2 brain-expressed transcripts and an eQTL relevant to hippocampal  
535 sclerosis of aging. *J. Neurochem.* 134, 1026–1039. doi:10.1111/jnc.13202.
- 536 Nichols, C. G., and Lederer, W. J. (1991). Adenosine triphosphate-sensitive potassium channels in  
537 the cardiovascular system. *Am J Physiol Hear. Circ Physiol Am. J. Physiol. -Heart Circ.*  
538 *Physiol.* 261, 1675–1686. doi:10.1152/ajpheart.1991.261.6.H1675.
- 539 Nichols, C. G., Singh, G. K., and Grange, D. K. (2013). KATP channels and cardiovascular disease:  
540 Suddenly a syndrome. *Circ. Res.* 112, 1059–1072. doi:10.1161/CIRCRESAHA.112.300514.
- 541 Parrinello, M., and Rahman, A. (1981). Polymorphic transitions in single crystals: A new molecular  
542 dynamics method. *J. Appl. Phys.* 52, 7182–7190. doi:10.1063/1.328693.
- 543 Pearson, E. R., Flechtner, I., Njølstad, P. R., Malecki, M. T., Flanagan, S. E., Larkin, B., et al. (2006).  
544 Switching from Insulin to oral sulfonylureas in patients with diabetes due to Kir6.2 mutations.  
545 *N. Engl. J. Med.* 355, 467–477. doi:10.1056/NEJMoa061759.
- 546 Piao, H., Cui, N., Xu, H., Mao, J., Rojas, A., Wang, R., et al. (2001). Requirement of Multiple  
547 Protein Domains and Residues for Gating K(ATP) Channels by Intracellular pH. *J. Biol. Chem.*  
548 276, 36673–36680. doi:10.1074/jbc.M106123200.
- 549 Remedi, M. S., Friedman, J. B., and Nichols, C. G. (2017). Diabetes induced by gain-of-function  
550 mutations in the Kir6.1 subunit of the KATP channel. *J. Gen. Physiol.* 149, 75–84.  
551 doi:10.1085/jgp.201611653.
- 552 Remedi, M. S., and Nichols, C. G. (2009). Hyperinsulinism and diabetes: Genetic dissection of  $\beta$  cell  
553 metabolism-excitation coupling in mice. *Cell Metab.* 10, 442–453.  
554 doi:10.1016/j.cmet.2009.10.011.

- 555 Scherer, D., Schworm, B., Seyler, C., Xynogalos, P., Scholz, E. P., Thomas, D., et al. (2017).  
556 Inhibition of inwardly rectifying Kir2.x channels by the novel anti-cancer agent gambogic acid  
557 depends on both pore block and PIP2 interference. *Naunyn. Schmiedeberg's. Arch. Pharmacol.*  
558 390, 701–710. doi:10.1007/s00210-017-1372-5.
- 559 Scurr, I., Wilson, L., Lees, M., Robertson, S., Kirk, E., Turner, A., et al. (2011). Cantú syndrome:  
560 Report of nine new cases and expansion of the clinical phenotype. *Am. J. Med. Genet. Part A*  
561 155, 508–518. doi:10.1002/ajmg.a.33885.
- 562 Seidel, T., and Langer, T. (2017). CDPKit, the Chemical Data Processing Toolkit. Available at:  
563 <https://github.com/aglanger/CDPKit> [Accessed May 16, 2018].
- 564 Shyng, S. L., and Nichols, C. G. (1998). Membrane phospholipid control of nucleotide sensitivity of  
565 K(ATP) channels. *Science (80-. )*. 282, 1138–1141. doi:10.1126/science.282.5391.1138.
- 566 Szentandrassy, N., Harmati, G., Bárándi, L., Simkő, J., Horváth, B., Magyar, J., et al. (2011). Effects  
567 of rosiglitazone on the configuration of action potentials and ion currents in canine ventricular  
568 cells. *Br. J. Pharmacol.* 163, 499–509. doi:10.1111/j.1476-5381.2011.01215.x.
- 569 Takanari, H., Nalos, L., Sary-Weinzinger, A., De Git, K. C. G., Varkevisser, R., Linder, T., et al.  
570 (2013). Efficient and specific cardiac IK1 inhibition by a new pentamidine analogue.  
571 *Cardiovasc. Res.* 99, 203–214. doi:10.1093/cvr/cvt103.
- 572 Tanabe, K., Tucker, S. J., Matsuo, M., Proks, P., Ashcroft, F. M., Seino, S., et al. (1999). Direct  
573 photoaffinity labeling of the Kir6.2 subunit of the ATP-sensitive K<sup>+</sup> channel by 8-azido-ATP. *J.*  
574 *Biol. Chem.* 274, 3931–3933. doi:10.1074/jbc.274.7.3931.
- 575 U.S. Food and Drug Administration (2011). Reminder to healthcare providers and patients to enroll  
576 in the Avandia-Rosiglitazone Medicines Access Program. *FDA Drug Saf. Commun.* Available  
577 at: <https://www.fda.gov/Drugs/DrugSafety/ucm277629.htm> [Accessed May 16, 2018].
- 578 Ueda, K., Komine, J., Matsuo, M., Seino, S., and Amachi, T. (1999). Cooperative binding of ATP  
579 and MgADP in the sulfonylurea receptor is modulated by glibenclamide. *Proc. Natl. Acad. Sci.*  
580 *U. S. A.* 96, 1268–1272. doi:10.1073/pnas.96.4.1268.
- 581 Van Bon, B. W. M., Gilissen, C., Grange, D. K., Hennekam, R. C. M., Kayserili, H., Engels, H., et  
582 al. (2012). Cantú syndrome is caused by mutations in ABCC9. *Am. J. Hum. Genet.* 90, 1094–  
583 1101. doi:10.1016/j.ajhg.2012.04.014.
- 584 Vanoye, C. G., MacGregor, G. G., Dong, K., Tang, L., Buschmann, A. S., Hall, A. E., et al. (2002).  
585 The carboxyl termini of KATP channels bind nucleotides. *J. Biol. Chem.* 277, 23260–23270.  
586 doi:10.1074/jbc.M112004200.
- 587 Verlet, L. (1967). Computer “experiments” on classical fluids. I. Thermodynamical properties of  
588 Lennard-Jones molecules. *Phys. Rev.* 159, 98–103. doi:10.1103/PhysRev.159.98.
- 589 Wang, J., Wang, W., Kollman, P. A., and Case, D. A. (2006). Automatic atom type and bond type  
590 perception in molecular mechanical calculations. *J. Mol. Graph. Model.* 25, 247–260.  
591 doi:10.1016/j.jmgl.2005.12.005.

- 592 Wang, J., Wolf, R. M., Caldwell, J. W., Kollman, P. A., and Case, D. A. (2004). Development and  
593 testing of a general Amber force field. *J. Comput. Chem.* 25, 1157–1174.  
594 doi:10.1002/jcc.20035.
- 595 Whorton, M. R., and MacKinnon, R. (2011). Crystal structure of the mammalian GIRK2 K<sup>+</sup> channel  
596 and gating regulation by G proteins, PIP2, and sodium. *Cell* 147, 199–208.  
597 doi:10.1016/j.cell.2011.07.046.
- 598 Wieder, M., Garon, A., Perricone, U., Boresch, S., Seidel, T., Almerico, A. M., et al. (2017).  
599 Common Hits Approach: Combining pharmacophore modeling and molecular dynamics  
600 simulations. *J. Chem. Inf. Model.* 57, 365–385. doi:10.1021/acs.jcim.6b00674.
- 601 Wolber, G., and Langer, T. (2005). LigandScout: 3-D pharmacophores derived from protein-bound  
602 ligands and their use as virtual screening filters. *J. Chem. Inf. Model.* 45, 160–169.  
603 doi:10.1021/ci049885e.
- 604 Wu, J. X., Ding, D., Wang, M., Kang, Y., Zeng, X., and Chen, L. (2018). Ligand binding and  
605 conformational changes of SUR1 subunit in pancreatic ATP-sensitive potassium channels.  
606 *Protein Cell* 9, 553–567. doi:10.1007/s13238-018-0530-y.
- 607 Yu, L., Jin, X., Cui, N., Wu, Y., Shi, Z., Zhu, D., et al. (2012). Rosiglitazone selectively inhibits  
608 KATP channels by acting on the KIR6 subunit. *Br. J. Pharmacol.* 167, 26–36.  
609 doi:10.1111/j.1476-5381.2012.01934.x.
- 610 Yu, L., Jin, X., Yang, Y., Cui, N., and Jiang, C. (2011). Rosiglitazone inhibits vascular KATP  
611 channels and coronary vasodilation produced by isoprenaline. *Br. J. Pharmacol.* 164, 2064–  
612 2072. doi:10.1111/j.1476-5381.2011.01539.x.
- 613 Zhang, H., He, C., Yan, X., Mirshahi, T., and Logothetis, D. E. (1999). Activation of inwardly  
614 rectifying K<sup>+</sup> channels by distinct PtdIns(4,5)P<sub>2</sub> interactions. *Nat. Cell Biol.* 1, 183–188.  
615 doi:10.1038/11103.
- 616 Zhang, R. S., Wright, J. D., Pless, S. A., Nunez, J. J., Kim, R. Y., Li, J. B. W., et al. (2015). A  
617 conserved residue cluster that governs kinetics of ATP-dependent gating of Kir6.2 potassium  
618 channels. *J. Biol. Chem.* 290, 15450–15461. doi:10.1074/jbc.M114.631960.
- 619 Zingman, L. V., Alekseev, A. E., Hodgson-Zingman, D. M., and Terzic, A. (2007). ATP-sensitive  
620 potassium channels: metabolic sensing and cardioprotection. *J. Appl. Physiol.* 103, 1888–1893.  
621 doi:10.1152/jappphysiol.00747.2007.

622

## 623 Tables

624 **Table 1. Three binding sites observed during unbiased MD simulations and their corresponding**  
625 **occupation time.** All three ligands occupied the binding site for at least 1  $\mu$ s and until the end of the  
626 simulation. Ligands migrate to binding site A at 300 ns, to binding site B right after the equilibration,  
627 and to binding site C at 200 ns.



| Binding site | Binding time of ligand to binding site | Stereochemistry of ligand |
|--------------|----------------------------------------|---------------------------|
| A            | 1.2 $\mu$ s (300 ns - 1.5 $\mu$ s)     | R conformer               |
| B            | 1.5 $\mu$ s                            | S conformer               |
| C            | 1.3 $\mu$ s (200 ns – 1.5 $\mu$ s)     | S conformer               |

628

629 **Table 2. Top ranked hit-list for binding site A\_ref.** The hit-list was established by screening the  
 630 dynamic pharmacophore models to the *Drugbank* database. Top 20 approved drugs ranked by CHA  
 631 score are proposed in the displayed hit-list.

| DrugBank ID | Generic name  | CHA score | Number of active pharmacophores |
|-------------|---------------|-----------|---------------------------------|
| DB08907     | Canagliflozin | 2.7417    | 3/5                             |
| DB01095     | Fluvastatin   | 2.7246    | 3/5                             |
| DB09351     | Levobetaxolol | 2.7035    | 3/5                             |
| DB00917     | Dinoprostone  | 1.8892    | 2/5                             |
| DB00195     | Betaxolol     | 1.862     | 2/5                             |
| DB00841     | Dobutamine    | 1.852     | 2/5                             |
| DB00287     | Travoprost    | 1.8516    | 2/5                             |
| DB00938     | Salmeterol    | 1.8475    | 2/5                             |
| DB00179     | Masoprocol    | 1.8458    | 2/5                             |
| DB00867     | Ritodrine     | 1.8104    | 2/5                             |
| DB09198     | Lobeglitazone | 1.8102    | 2/5                             |
| DB04855     | Dronedarone   | 1.8096    | 2/5                             |

|         |                       |        |     |
|---------|-----------------------|--------|-----|
| DB06817 | Raltegravir           | 1.805  | 2/5 |
| DB09570 | Ixazomib              | 1.8038 | 2/5 |
| DB01346 | Quinidine barbiturate | 1.8019 | 2/5 |
| DB00204 | Dofetilide            | 1.7997 | 2/5 |
| DB01240 | Epoprostenol          | 1.7992 | 2/5 |
| DB00662 | Trimethobenzamide     | 1.7935 | 2/5 |
| DB08875 | Cabozantinib          | 1.7838 | 2/5 |
| DB09330 | Osimertinib           | 1.7275 | 2/5 |

632

### 633 **Figure legends**

634 **Figure 1. Simulation setups: The first and last frame of free MD simulation.** Protein (grey cartoon)  
635 is embed in the lipid bilayer (cyan lines with red head groups). As a starting simulation setup ( $t=0$ ), 20  
636 ligands (shown as spheres) were randomly distributed in the solvent. After a 1.5  $\mu$ s MD simulation,  
637 the ligands either are bound to the protein or entered the lipid phase.

638

639 **Figure 2. Three binding sites observed after 1.5  $\mu$ s unbiased MD simulation.** The protein is  
640 represented as cartoon; adjacent subunits are colored in green and grey, respectively. PIP<sub>2</sub> molecules  
641 are shown as orange sticks. Ligands are represented as purple spheres. **(A)** Side view of the whole  
642 protein highlighting the three ligands bound to binding sites A - C. Site A: in close proximity to the  
643 PIP<sub>2</sub> binding site; Site B: at the interface between 2 CTDs; Site C: between the  $\beta$ -sheet  $\beta$ D and the  $\beta$ G-  
644  $\alpha$ G loop. **(B)** Bottom view of Site B and Site C. **(C)** Detail view of site A: residues within 6 Å of the  
645 ligand are labeled and presented as grey sticks. The ligand mainly forms hydrophobic interaction with  
646 LEU57 and ILE60; additionally, it forms hydrophobic and hydrogen bond interactions with lipid  
647 molecules (transparent sticks in light grey).

648

649 **Figure 3. Potential of Mean Forces (PMFs) derived from umbrella sampling for both RSG and**  
650 **N-RSG at the three binding sites.** The energy profiles are depicted including their standard  
651 deviations. The WHAM histograms are shown in Supplementary Figure 4. Site A\_ref shows higher  
652 binding affinity for both, RSG and N-RSG, compared to the other binding sites.

653

654 **Figure 4. RSG interactions with the protein and PIP<sub>2</sub> at binding site A\_ref.** (A) Molecular structure  
655 of RSG including the denotation corresponding to the interaction map. (B) Interaction map of RSG  
656 with protein and PIP<sub>2</sub> during 200 ns MD simulation. The matrix is colored and numbered by the  
657 percentage of frames, in which interactions were observed: aromatic (AR), hydrophobic (H), hydrogen  
658 bond (HB). The residues in the Kir6.1 are named by the corresponding amino acid with its residue  
659 number and chain ID (A or D). (C) RMSD plot of RSG at binding site A\_ref during a 250 ns MD  
660 simulation. (D) Best PMF energy pose: Kir6.1 is represented as cartoon with two neighboring subunits  
661 colored in grey and green, respectively. RSG (purple), the surrounding residues within 3.5 Å, and the  
662 PIP<sub>2</sub> (orange) are shown as stick.

663

664 **Figure 5. Inhibition of Kir6.2/SUR2A carried I<sub>KATP</sub> by Travoprost, Betaxolol and Ritodrine.** (A)  
665 Current traces of Kir6.2/SUR2A channels in the inside-out orientation exposed to Travoprost,  
666 Betaxolol or Ritodrine at the indicated drug concentrations (0, 3 and 30 μM). Dotted horizontal line at  
667 0 pA. (B) Normalized block of inward (black bars, at -80 mV) and outward (open bars, at +50 mV)  
668 currents with 30 μM of the indicated drug. \*P<0.001 (paired T-test, inward vs. outward; n=8, n=11  
669 and n=9 for Travoprost, Betaxolol and Ritodrine, respectively). (C) IC<sub>50</sub> curves of outward components  
670 of Kir6.2/SUR2A in response to different concentrations of Travoprost (open squares; n=8), Betaxolol  
671 (black triangles; n=11 or n=7 (100 μM)) and Ritodrine (black circles; n=9 (control and 1 μM), n=8 (0.3  
672 μM) or n=7 (3, 10, 30 μM)). Data were fitted with Hill equation to estimate the IC<sub>50</sub> values. Data in  
673 panels b and c are shown as mean±SEM.

674

675 **Figure 6. Sequence alignment of Kir6.x, Kir1.1, Kir2.1 and Kir4.1 from binding site A\_ref.** The  
676 alignment of residues on chain A and chain D within 3.5 Å of RSG at the lowest PMF energy pose.  
677 Coloring of the alignment was performed using the BLOSUM62 algorithm. SH: slide helix; TM1:  
678 transmembrane helix 1; TM2: transmembrane helix 2.

679

680 **Figure 7. Inhibition of C166S (Kir6.2) and S1020P (SUR2A) by Rosiglitazone, Travoprost,**  
681 **Betaxolol and Ritodrine**

682 IC<sub>50</sub> curves of outward components of Kir6.2/SUR2A (WT, C166S Kir6.2, S1020P SUR2A) in  
683 response to different concentrations of Rosiglitazone, Travoprost, Betaxolol and Ritodrine. N-values  
684 are: WT, C166S and S1020P respectively: Rosiglitazone n=8, 8, 6; Travoprost n=8, 7, 11; Betaxolol  
685 n=11, 7, 7; Ritodrine n=9, 8, 7. Data were fitted with Hill equation to estimate the IC<sub>50</sub> values. Data  
686 are shown as mean±SEM.

687

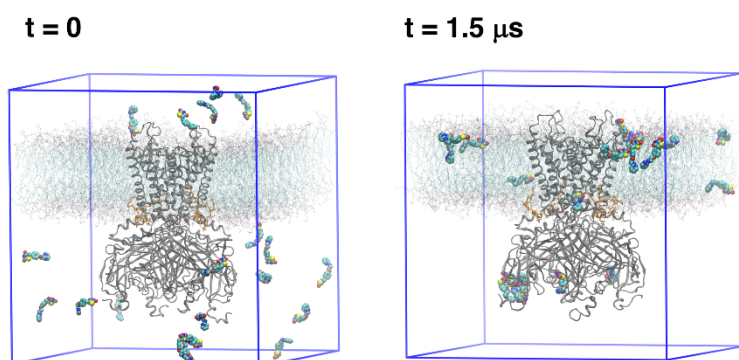

**Figure 1**

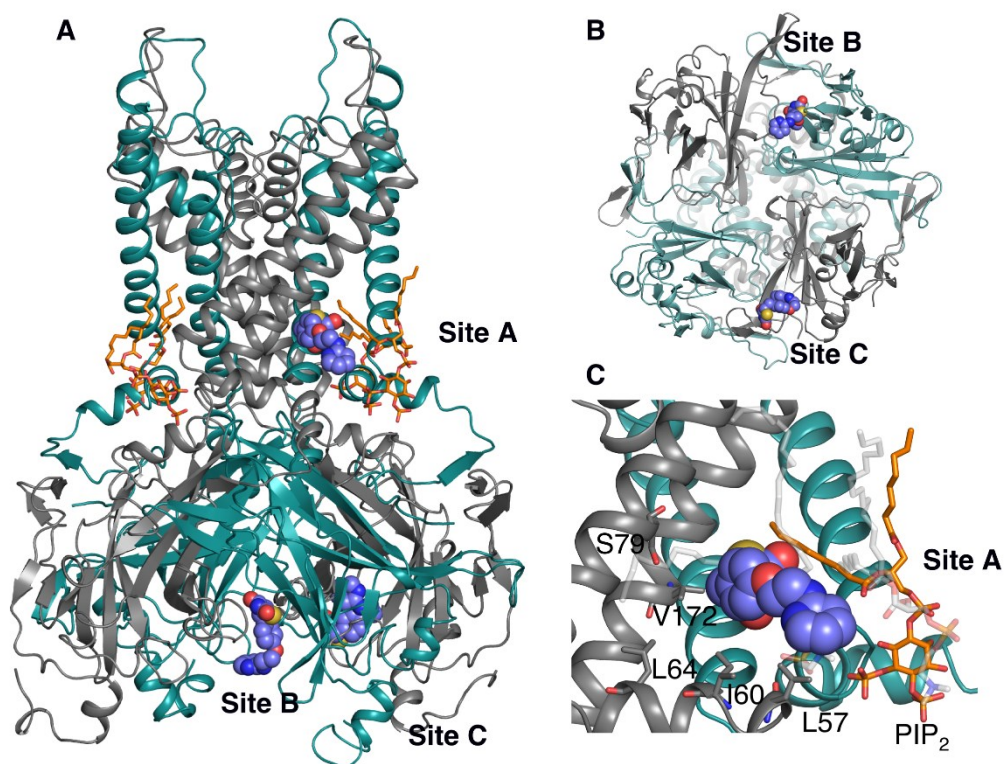

**Figure 2**

### PMFs at binding sites

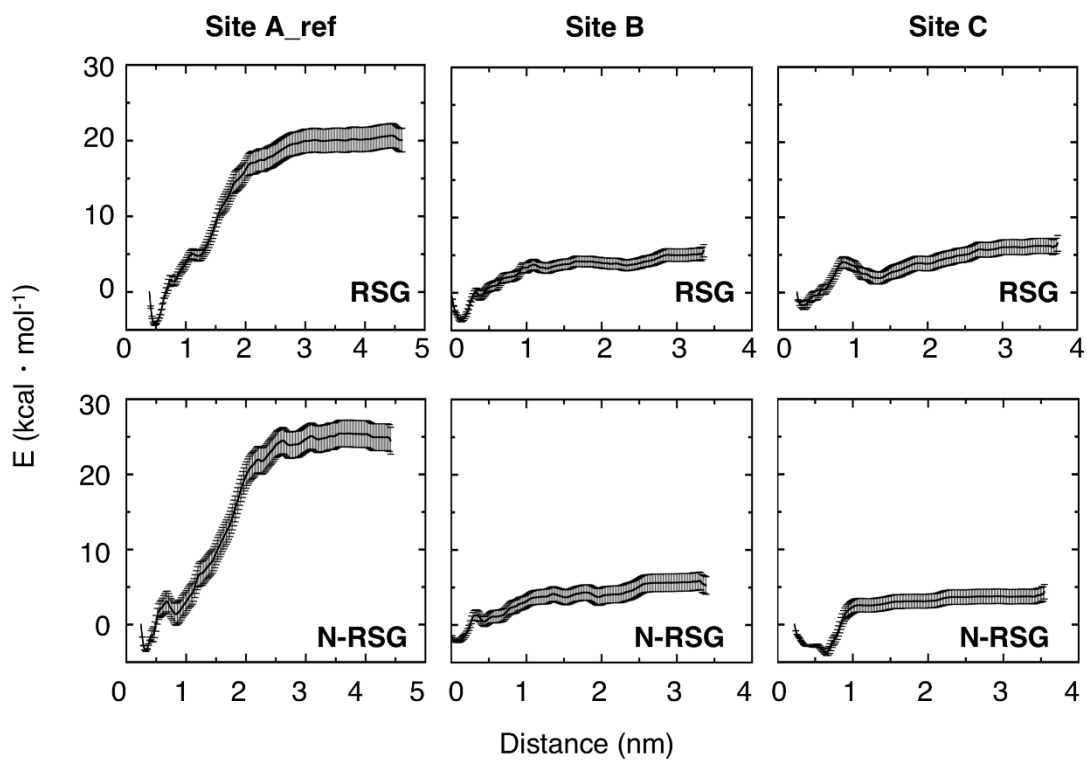

Figure 3

### A Rosiglitazone (RSG)

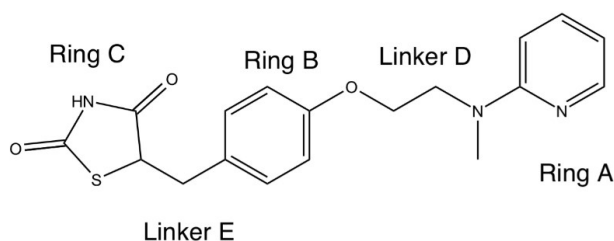

### C RMSD of RSG

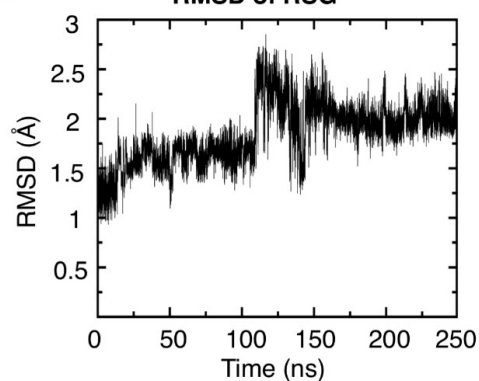

### B

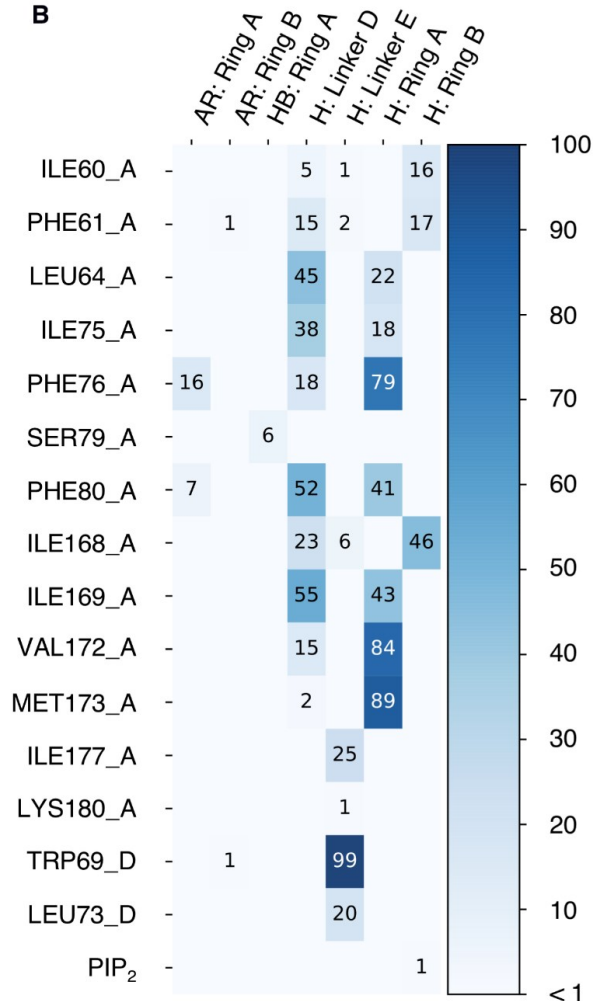

### D Site A\_ref

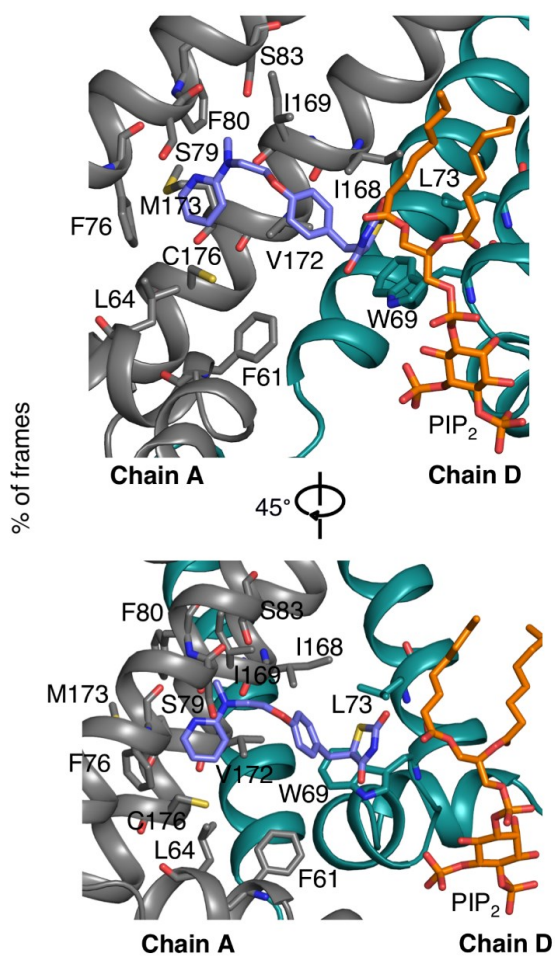

Figure 4

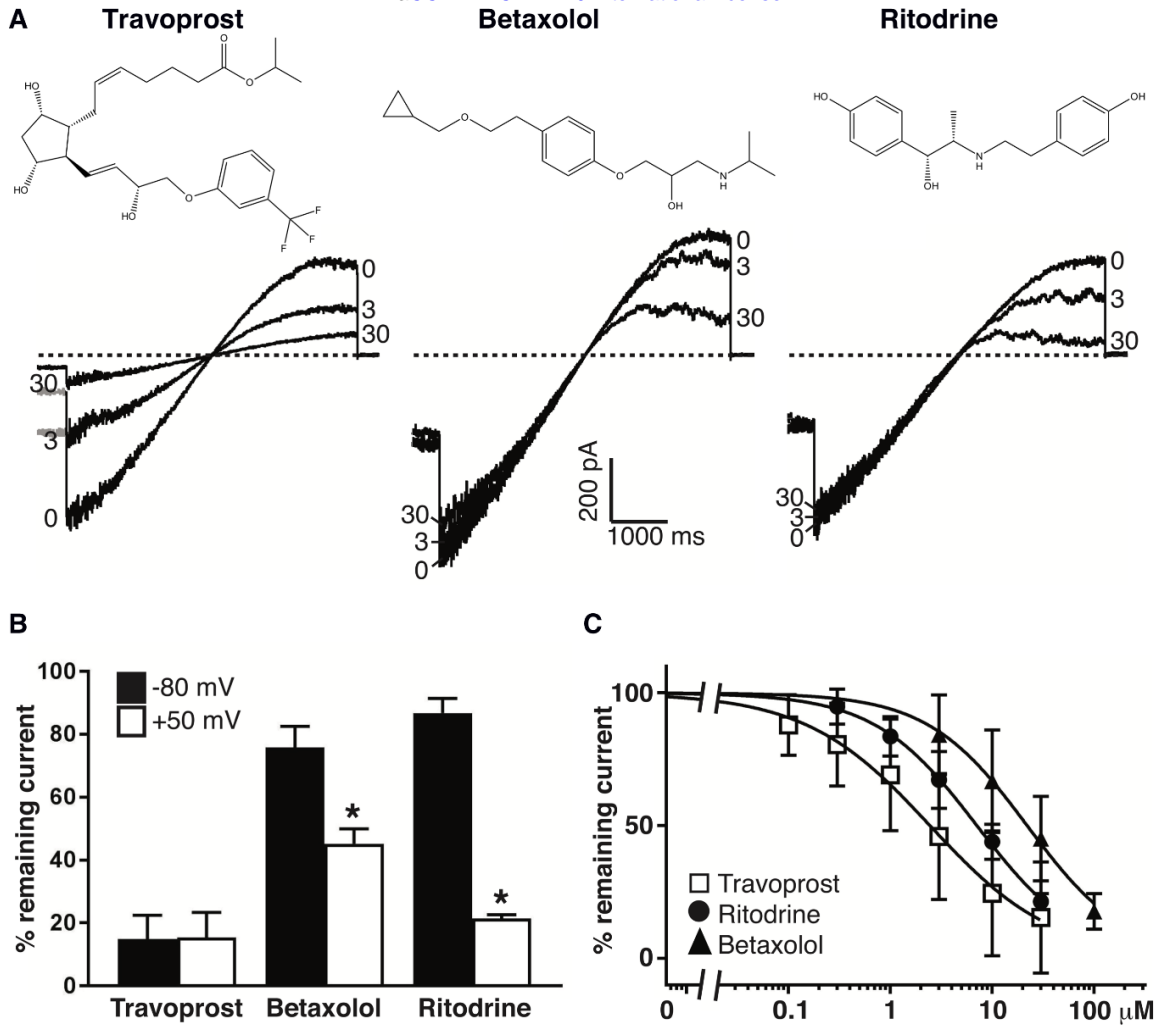

Figure 5

|        | Chain A SH |           |    | Chain A TM1 |                   |    |    |   | Chain A TM2 |     |                 |     |     |   | Chain D TM1 |    |
|--------|------------|-----------|----|-------------|-------------------|----|----|---|-------------|-----|-----------------|-----|-----|---|-------------|----|
|        | 61         | 64        |    | 76          | 79                | 80 | 83 |   | 168         | 169 | 172             | 173 | 176 |   | 69          | 73 |
| Kir6.1 | I          | F T T L V | 65 | I           | F T M S F L C S W |    | 84 | L | I           | I   | N A V M L G C I | 177 |     | K | W R H T L V | 74 |
| Kir6.2 | V          | F T T L V | 64 | I           | F T M S F L C S W |    | 83 | L | M           | I   | N A I M L G C I | 167 |     | K | W P H T L L | 73 |
| Kir1.1 | I          | W T T V L | 73 | I           | F I T A F L G S W |    | 92 | V | I           | I   | N S F M C G A I | 178 |     | K | W R Y K M T | 82 |
| Kir2.1 | I          | F T T C V | 77 | I           | F C L A F V L S W |    | 96 | C | I           | I   | D A F I I G A V | 179 |     | R | W R W M L V | 86 |
| Kir4.1 | L          | W T T F I | 60 | L           | F S A T F A G T W |    | 79 | T | I           | L   | E I F I T G T F | 165 |     | Q | W R Y K L L | 69 |

Figure 6

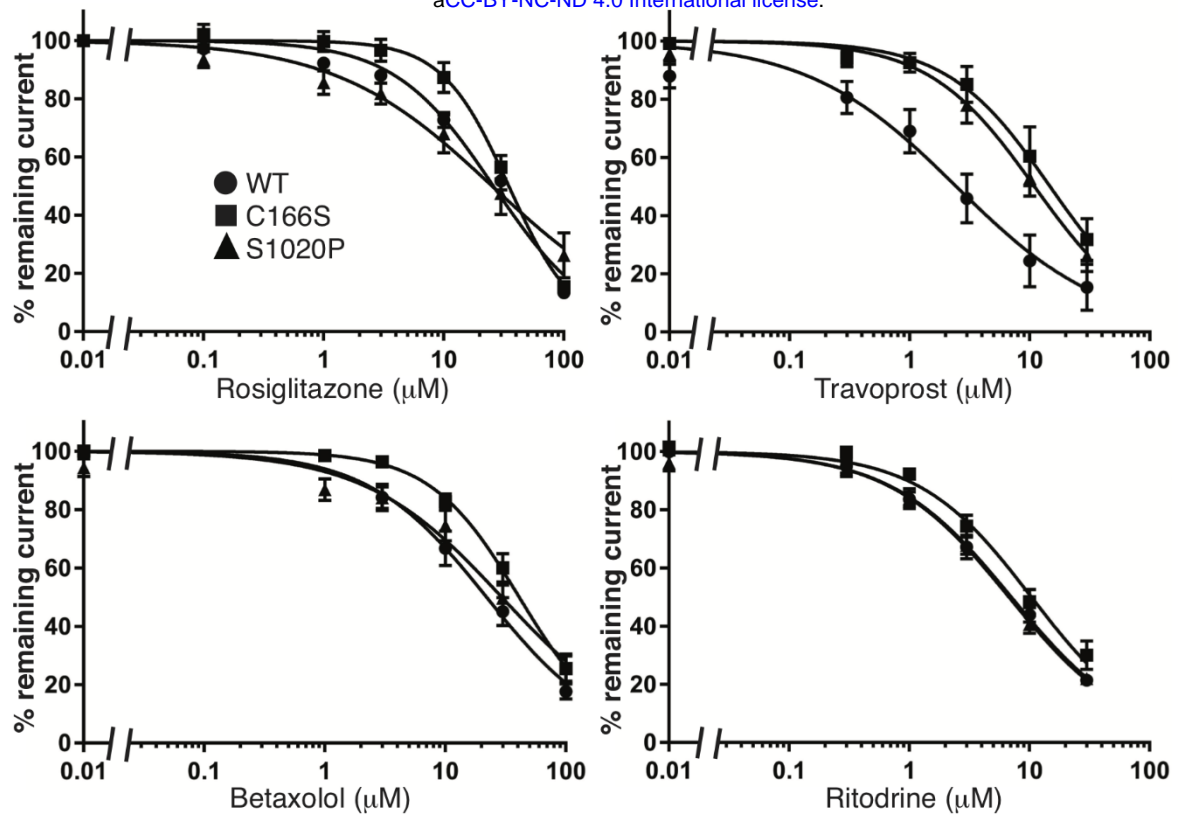

Figure 7
